# Supplementary material for: A Trip Back Home: Resistance to Herbivores of Native and Non-Native Plant Populations of Datura stramonium
Source: MDPI journal article supplement (doi:10.3390/plants13010131), 2024-01-02
Supplement: s1 [file s1]

Supplementary Materials

**A Trip Back Home: Resistance to Herbivores of Native  
and Non-Native Plant Populations of *Datura*  
*stramonium***

**Table S1.** Nested analysis of variance of traits measured in plants of *Datura stramonium* between Ranges (Mexico, Spain), Population nested with Range, and Families nested within Population, within Ranges. A.—Herbivores (*Epitrix parvula*, *Trichobaris soror*, *Sphenarium purpurascens* and *Lema daturaphila*). B.—Plant height; C.—Proportion of leaf area removed by herbivores. D.—Number of fruits per plant measured at two experimental sites (Atlixco and Teotihuacán). E.—Tropane alkaloids (atropine and scopolamine) measured only in plants at the Teotihuacán site. Statistical analyses were performed on transformed values of variables (see Results). \*,  $p < 0.05$ .

| <b>A.- Herbivores</b>      |           |           |           |          |                  |                        |           |           |          |                  |
|----------------------------|-----------|-----------|-----------|----------|------------------|------------------------|-----------|-----------|----------|------------------|
| <i>Epitrix parvula</i>     |           |           |           |          |                  | <i>Epitrix parvula</i> |           |           |          |                  |
| <b>Atlixco</b>             |           |           |           |          |                  | <b>Teotihuacán</b>     |           |           |          |                  |
| <b>Source of Variation</b> | <b>SS</b> | <b>df</b> | <b>MS</b> | <b>F</b> | <b>Prob&gt;F</b> | <b>SS</b>              | <b>df</b> | <b>MS</b> | <b>F</b> | <b>Prob&gt;F</b> |
| Range                      | 0.0023    | 1         | 0.0023    | 0.0053   | 0.9486           | 0.1835                 | 1         | 0.1835    | 3.996    | 0.1836           |
| Population (Range)         | 0.8786    | 2         | 0.4393    | 0.9209   | 0.4010           | 0.0918                 | 2         | 0.0459    | 0.095    | 0.909            |
| Families (Population)      | 31.8814   | 68        | 0.4688    | 0.8664   | 0.7430           | 23.6458                | 57        | 0.4850    | 1.098    | 0.3117           |
| Error                      | 75.7624   | 140       | 0.5411    |          |                  | 94.4543                | 214       | 0.4413    |          |                  |
| Total                      | 109.0412  | 211       |           |          |                  | 122.4200               | 274       |           |          |                  |

  

| <i>Trichobaris soror</i>   |           |           |           |          |                  | <i>Trichobaris soror</i> |           |           |          |                  |
|----------------------------|-----------|-----------|-----------|----------|------------------|--------------------------|-----------|-----------|----------|------------------|
| <b>Atlixco</b>             |           |           |           |          |                  | <b>Teotihuacán</b>       |           |           |          |                  |
| <b>Source of Variation</b> | <b>SS</b> | <b>df</b> | <b>MS</b> | <b>F</b> | <b>Prob&gt;F</b> | <b>SS</b>                | <b>df</b> | <b>MS</b> | <b>F</b> | <b>Prob&gt;F</b> |
| Range                      | 0.1716    | 1         | 0.7116    | 0.021    | 0.8970           | 4.0514                   | 1         | 4.0514    | 0.8500   | 0.4530           |
| Population (Range)         | 16.194    | 2         | 8.097     | 3.283    | 0.0420*          | 9.6430                   | 2         | 4.8215    | 3.8704   | 0.0250*          |
| Families (Population)      | 171.369   | 69        | 2.483     | 1.106    | 0.2990           | 75.625                   | 57        | 1.3267    | 1.5587   | 0.0170*          |
| Error                      | 359.197   | 160       | 2.244     |          |                  | 125.1241                 | 147       | 0.8511    |          |                  |
| Total                      | 546.504   | 232       |           |          |                  | 215.4251                 | 207       |           |          |                  |

| <i>Sphenarium purpurascens</i> |         |     |       |       |         | <i>Lema daturaphila</i> |     |        |        |        |
|--------------------------------|---------|-----|-------|-------|---------|-------------------------|-----|--------|--------|--------|
| Atlixco                        |         |     |       |       |         | Teotihuacán             |     |        |        |        |
| Source of Variation            | SS      | df  | MS    | F     | Prob>F  | SS                      | df  | MS     | F      | Prob>F |
| Range                          | 9.051   | 1   | 9.051 | 42.33 | 0.0210* | 0.9642                  | 1   | 0.9642 | 25.737 | 0.036* |
| Population (Range)             | 0.423   | 2   | 0.211 | 0.369 | 0.6910  | 0.0747                  | 2   | 0.0373 | 0.076  | 0.926  |
| Families (Population)          | 37.279  | 68  | 0.548 | 0.716 | 0.9370  | 28.3894                 | 57  | 0.4980 | 1.437  | 0.034* |
| Error                          | 107.177 | 140 | 0.765 |       |         | 72.7495                 | 210 | 0.3464 |        |        |
| Total                          | 156.158 | 211 |       |       |         | 102.4629                | 270 |        |        |        |

| B.-Plant height       |          |     |          |       |        |             |     |        |      |        |
|-----------------------|----------|-----|----------|-------|--------|-------------|-----|--------|------|--------|
| Atlixco               |          |     |          |       |        | Teotihuacán |     |        |      |        |
| Source of Variation   | SS       | df  | MS       | F     | Prob>F | SS          | df  | MS     | F    | Prob>F |
| Range                 | 17116.90 | 1   | 17116.90 | 11.42 | 0.077  | 91.94       | 1   | 91.94  | 1.15 | 0.395  |
| Population (Range)    | 3019.43  | 2   | 1509.72  | 5.07  | 0.008* | 159.30      | 2   | 79.65  | 0.39 | 0.675  |
| Families (Population) | 21190.6  | 69  | 307.11   | 1.72  | 0.002* | 11521.90    | 57  | 202.13 | 1.04 | 0.403  |
| Error                 | 28518.26 | 160 | 178.23   |       |        | 38315.31    | 198 | 193.51 |      |        |
| Total                 | 74173.94 | 232 |          |       |        | 49963.00    | 258 |        |      |        |

**C.-Proportion of leaf area damaged by herbivores**

| <b>Atlixco</b>             |           |           |           |          |                  | <b>Teotihuacán</b> |           |           |          |                  |
|----------------------------|-----------|-----------|-----------|----------|------------------|--------------------|-----------|-----------|----------|------------------|
| <b>Source of Variation</b> | <b>SS</b> | <b>df</b> | <b>MS</b> | <b>F</b> | <b>Prob&gt;F</b> | <b>SS</b>          | <b>df</b> | <b>MS</b> | <b>F</b> | <b>Prob&gt;F</b> |
| Range                      | 0.0753    | 1         | 0.0753    | 4.14     | 0.1780           | 0.1695             | 1         | 0.1695    | 28.81    | 0.033*           |
| Population (Range)         | 0.0365    | 2         | 0.0182    | 2.69     | 0.0740           | 0.0117             | 2         | 0.0058    | 0.23     | 0.78             |
| Families (Population)      | 0.4775    | 69        | 0.0069    | 1.34     | 0.0655           | 1.3933             | 56        | 0.0248    | 1.21     | 0.17             |
| Error                      | 0.8226    | 160       | 0.0051    |          |                  | 3.5084             | 171       | 0.0205    |          |                  |
| Total                      | 1.4351    | 232       |           |          |                  | 5.0740             | 230       |           |          |                  |

**D.- No. of fruits**

| <b>Atlixco</b>             |           |           |           |          |                  | <b>Teotihuacán</b> |           |           |          |                  |
|----------------------------|-----------|-----------|-----------|----------|------------------|--------------------|-----------|-----------|----------|------------------|
| <b>Source of Variation</b> | <b>SS</b> | <b>df</b> | <b>MS</b> | <b>F</b> | <b>Prob&gt;F</b> | <b>SS</b>          | <b>df</b> | <b>MS</b> | <b>F</b> | <b>Prob&gt;F</b> |
| Range                      | 0.0176    | 1         | 0.0176    | 0.01     | 0.9203           | 2.0842             | 1         | 2.0842    | 1.94     | 0.297            |
| Population (Range)         | 2.7839    | 2         | 1.3919    | 3.84     | 0.0255*          | 2.1408             | 2         | 1.0704    | 2.15     | 0.123            |
| Families (Population)      | 25.0522   | 69        | 0.3630    | 1.02     | 0.4325           | 28.8044            | 57        | 0.5053    | 1.24     | 0.139            |
| Error                      | 56.4242   | 160       | 0.3526    |          |                  | 75.4348            | 186       | 0.4055    |          |                  |
| Total                      | 84.6675   | 232       |           |          |                  | 109.1682           | 246       |           |          |                  |

### E.- Alkaloids, Teotihuacán

| Source of Variation   | Atropine |     |        |      |        | Scopolamine |     |        |      |        |
|-----------------------|----------|-----|--------|------|--------|-------------|-----|--------|------|--------|
|                       | SS       | df  | MS     | F    | Prob>F | SS          | df  | MS     | F    | Prob>F |
| Range                 | 0.5225   | 1   | 0.5225 | 0.72 | 0.483  | 0.5755      | 1   | 0.5755 | 0.38 | 0.596  |
| Population (Range)    | 1.4642   | 2   | 0.7321 | 2.65 | 0.077  | 3.0135      | 2   | 1.5067 | 3.88 | 0.025* |
| Families (Population) | 13.5551  | 50  | 0.2711 | 0.87 | 0.693  | 20.1718     | 50  | 0.4034 | 1.45 | 0.052  |
| Error                 | 35.8149  | 116 | 0.3087 |      |        | 32.2515     | 116 | 0.2780 |      |        |
| Total                 | 52.7497  | 169 |        |      |        | 55.7017     | 169 |        |      |        |

**Table S2.** Geographic location and environmental characteristics of the (A) Experimental common gardens and (B) sampled populations of *Datura stramonium* of each range (Spain or Mexico). (C) Number of families studied per population in each experimental site. (D) Average number ( $\pm$  S.E.) of adults, egg clusters and larvae of the insect *Lema daturaphila* on plants of *D. stramonium* of native and non-native populations.

(A).- Experimental common gardens

| Locality    | State or Region | Geographic coordinates   | Altitude<br>m a. s. l. | Mean Annual<br>Precipitation (mm) | Mean Annual<br>temperature (° C) |
|-------------|-----------------|--------------------------|------------------------|-----------------------------------|----------------------------------|
| Atlixco     | State of Puebla | 18°54'45"N<br>98°25'40"W | 1834                   | 1248                              | 18.6                             |
| Teotihuacán | State of Mexico | 19°41'33"N<br>98°50'38"W | 2280                   | 823                               | 15.3                             |

(B).- Locality of sampled populations

| Locality    | State or Region  | Geographic coordinates            | Altitude<br>m a. s. l. | Mean Annual<br>Precipitation (mm) | Mean Annual<br>temperature (° C) |
|-------------|------------------|-----------------------------------|------------------------|-----------------------------------|----------------------------------|
| Teotihuacán | State of Mexico  | 19°41'33"N<br>98°50'38"W          | 2280                   | 823                               | 15.3                             |
| Ticumán     | State of Morelos | 18°45'40"N<br>99°07'09"W          | 972                    | 1150                              | 21.3                             |
| Valdeflores | Sevilla, Spain   | 37° 843' 2.23"N<br>06°818'50.44"W | 287                    | 598.2                             | 17.0                             |
| Zubia       | Granada, Spain   | 37°07'14"N<br>03°35'06"W          | 153                    | 453                               | 15.3                             |

(C). -Number of families studied per population in each experimental site.

| Population  | Experimental site |             |
|-------------|-------------------|-------------|
|             | Atlixco           | Teotihuacán |
| Teotihuacán | 19                | 15          |
| Ticumán     | 17                | 15          |
| Valdeflores | 21                | 15          |
| Zubia       | 16                | 16          |

(D).- Average values ( $\pm$  S.E.) of the number of adults, egg clusters and larvae of the insect *Lema daturaphila* on plants of *Datura stramonium* of native and non-native populations.

| Population  | N  | # Adults          | # Egg clusters    | # Larvae          |
|-------------|----|-------------------|-------------------|-------------------|
| Teotihuacán | 74 | $0.939 \pm 0.198$ | $4.530 \pm 0.541$ | $1.522 \pm 0.200$ |
| Ticumán     | 72 | $0.985 \pm 0.235$ | $4.493 \pm 0.680$ | $1.838 \pm 0.327$ |
| Valdeflores | 68 | $0.667 \pm 0.207$ | $3.862 \pm 0.528$ | $1.031 \pm 0.190$ |
| Zubia       | 79 | $0.694 \pm 0.198$ | $4.932 \pm 0.627$ | $1.486 \pm 0.245$ |
